# Supplementary material
Source: publisher figshare collection journal article supplement (https://tandf.figshare.com/ndownloader/files/21747273)
Supplement: Supplementary file 1 [file 21747273]

**Supporting information**

**Ag/BiOI/C enhanced photocatalytic activity under visible light irradiation**


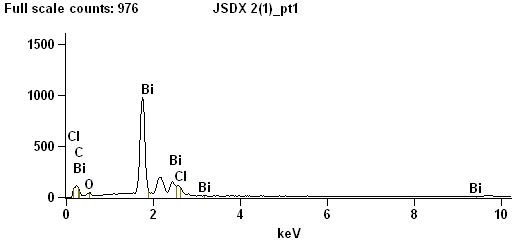


Fig. S1 EDS spectra over Ag/BiOI/C (0.5:2:3) composite.





Fig. S2 MB adsorption on different samples.


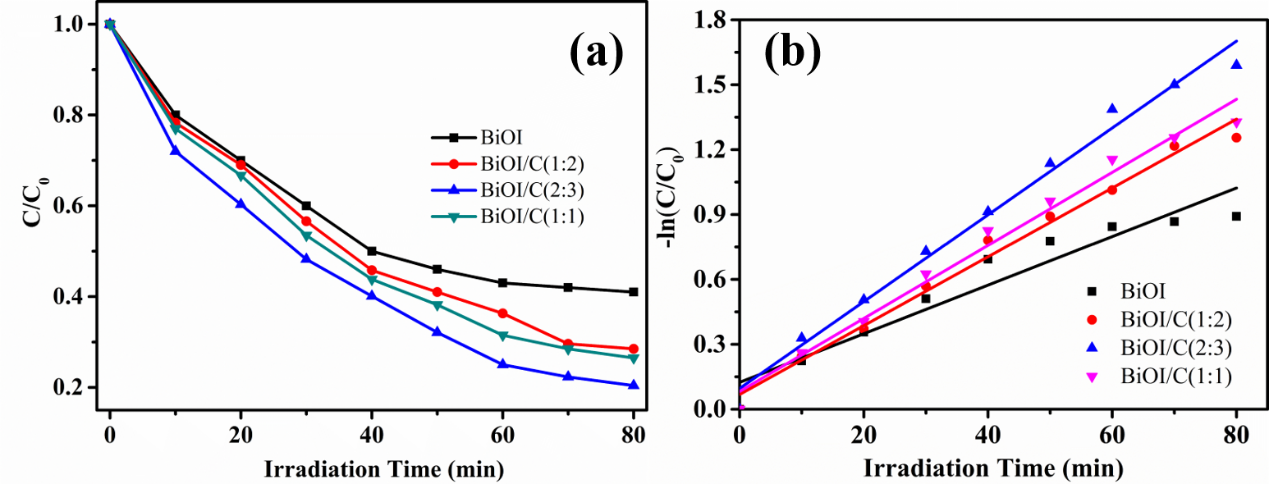


Fig. S3 The degradation efficiency (a) and plots of -ln(C/C0) versus time (b) over BiOI/C composites under visible light.
